# Supplementary material for: Symphysis-fundus height measurement to predict small-for-gestational-age status at birth: a systematic review
Source: PubMed Central journal article supplement (PMC4328041; doi:10.1186/s12884-015-0461-z), 2015-02-10
Supplement: 12884_2015_461_MOESM1_ESM.pdf [file 12884_2015_461_MOESM1_ESM.pdf]

Medline in-process and other non-indexed citations, Ovid Medline (R) (1946-), and Embase (1974-)

- 1 (fund\* adj height\*).mp.
- 2 (symph\* adj fund\*).mp.
- 3 (uter\* adj height\*).mp.
- 4 (symph\* adj height\*).mp.
- 5 (gravidogram).mp.
- 6 1 or 2 or 3 or 4 or 5

Cinahl (1981-)

- S1 (MH "Fundal Height")
- S2 fund\* height\*
- S3 symph\* fund\*
- S4 uter\* height\*
- S5 symph\* height\*
- S6 gravidogram
- S7 S1 or S2 or S3 or S4 or S5 or S6

Swemed+ (1977-)

- 1 exp:"fundal height"
- 2 fund\* height\*
- 3 symph\* fund\*
- 4 uter\* height\*
- 5 symph\* height\*
- 6 symfys\* fundus\*
- 7 symfys\*
- 8 gravidogram
- 9 1 or 2 or 3 or 4 or 5 or 6 or 7 or 8

The Cochrane Library

(fund\* NEXT height\*):ti,ab,kw or (symph\* NEXT fund\*):ti,ab,kw or (uter\* NEXT height\*):ti,ab,kw or (symph\* NEXT height\*):ti,ab,kw or (gravidogram).ti,ab,kw
