# Supplementary material for: Symphysis-fundus height measurement to predict small-for-gestational-age status at birth: a systematic review
Source: PubMed Central journal article supplement (PMC4328041; doi:10.1186/s12884-015-0461-z), 2015-02-10
Supplement: 12884_2015_461_MOESM2_ESM.pdf [file 12884_2015_461_MOESM2_ESM.pdf]

| <b>Domain</b>      | <b>Signaling Questions*</b>                                                                                                                                                                                                                            | <b>Risk of Bias†</b>                                                                   | <b>Applicability Concerns†</b>                                                                                 |
|--------------------|--------------------------------------------------------------------------------------------------------------------------------------------------------------------------------------------------------------------------------------------------------|----------------------------------------------------------------------------------------|----------------------------------------------------------------------------------------------------------------|
| Patient Selection  | (1) Was a consecutive or random sample of patients enrolled?<br><br>(2) Was a case-control design avoided?<br>(3) Did the study avoid inappropriate exclusions?                                                                                        | Could the selection of patients have introduced bias?                                  | Are there concerns that the included patients and setting do not match the review question?                    |
| Index Test         | (1) Were the index test results interpreted without knowledge of the results of the reference standard?<br><br>(2) If a threshold was used, was it pre-specified?                                                                                      | Could the conduct or interpretation of the index test have introduced bias?            | Are there concerns that the index test, its conduct, or interpretation differ from the review question?        |
| Reference Standard | (1) Is the reference standard likely to correctly classify the target condition?<br><br>(2) Were the reference standard results interpreted without knowledge of the results of the index test?                                                        | Could the reference standard, its conduct, or its interpretation have introduced bias? | Are there concerns that the target condition as defined by the reference standard does not match the question? |
| Flow and Timing    | (1) Was there an appropriate interval between index test and reference standard?<br>(2) Did all patients receive a reference standard?<br>(3) Did all patients receive the same reference standard?<br>(4) Were all patients included in the analysis? | Could the patient flow have introduced bias?                                           | Not applicable                                                                                                 |

\* Signaling questions are rated “yes”, “no”, or “unclear”. † Risk of bias judgments and concerns related to applicability are rated “high”, “low” or “unclear”.

Reference: Whiting PF, Rutjes AW, Westwood ME, Mallett S, Deeks JJ, Reitsma JB, Leeflang MM, Sterne JA, Bossuyt PM: QUADAS-2: a revised tool for the quality assessment of diagnostic accuracy studies. *Ann Intern Med* 2011, 155(8):529-536.
