# Supplementary material for: Symphysis-fundus height measurement to predict small-for-gestational-age status at birth: a systematic review
Source: PubMed Central journal article supplement (PMC4328041; doi:10.1186/s12884-015-0461-z), 2015-02-10
Supplement: 12884_2015_461_MOESM3_ESM.pdf [file 12884_2015_461_MOESM3_ESM.pdf]

| Nr. Study                                                                                                                                                                                                                                                             | Reason for exclusions     |
|-----------------------------------------------------------------------------------------------------------------------------------------------------------------------------------------------------------------------------------------------------------------------|---------------------------|
| 1. Symphysis-fundal height measurement. The practising midwife 2000, 3(1):10.                                                                                                                                                                                         | Not an original study     |
| 2. Adjahoto EO, Djossou KP, Hodonou KA: Prediction of fetal hypotrophy by uterine height. [French] Prediction de l'hypotrophie foetale par la hauteur uterine. J Gynecol Obstet Biol Reprod (Paris) 1999, 28(4):352-357.                                              | Population not relevant   |
| 3. Azziz R, Smith S, Fabro S: The development and use of a standard symphysial-fundal height growth curve in the prediction of small for gestational age neonates. International Journal of Gynecology and Obstetrics 1988, 26(1):81-87.                              | Study design not relevant |
| 4. Belizan JM, Villar J, Nardin JC: Diagnosis of intrauterine growth retardation by a simple clinical method: Measurement of uterine height. Am J Obstet Gynecol 1978, 131(6):643-646.                                                                                | Population not relevant   |
| 5. Berry M, Coyaji KJ, Gogoi MP, Kodkany BS, Parikh KS, Patel D, Rawal MY, Sengupta PC, Walvekar V, Dhillon BS: Foetal growth parameters--clinical versus ultrasonographic. Indian J Pediatr 1992, 59(1):91-101.                                                      | Index test not relevant   |
| 6. Cnattingius S, Axelsson O, Eklund G, Lindmark G: Screening for intrauterine growth retardation in late pregnancy. Early Hum Dev 1985, 10(3-4):225-235.                                                                                                             | Population not relevant   |
| 7. Cox G, Walsh P, Stack J, Murphy H: The value of fundal height measurement in prediction of fetal growth retardation. Ir Med J 1983, 76(2):95-96.                                                                                                                   | Population not relevant   |
| 8. Cronje HS, Bam RH, Muir A: Validity of symphysis fundus growth measurements. International Journal of Gynecology and Obstetrics 1993, 43(2):157-161.                                                                                                               | Population not relevant   |
| 9. Engstrom JL, Work Jr BA: Prenatal prediction of small- and large-for-gestational age neonates. Journal of obstetric, gynecologic, and neonatal nursing : JOGNN / NAACOG 1992, 21(6):486-495.                                                                       | Population not relevant   |
| 10. Feiks A, Gring H, Gruber W: The value of the symphysis-fundus measurement in prenatal care. [German] Stellenwert der Symphysen-Fundusmessung in der Schwangerenvorsorge. Gynakol Rundsch 1988, 28 Suppl 2:135-137.                                                | Study design not relevant |
| 11. Fescina RH, Quevedo C, Martell M, Nieto F, Schwarcz R: Uterine height as a method of predicting fetal growth. [Spanish] Altura uterina como metodo para predecir el crecimiento fetal. Bol Oficina Sanit Panam 1984, Pan American Sanitary Bureau. 96(5):377-386. | Population not relevant   |
| 12. Foley ME: Measurement of fundal height. Ir Med J 1991, 84(4):114.                                                                                                                                                                                                 | Not an original study     |
| 13. Gardosi J, Francis A: Controlled trial of fundal height measurement plotted on customised antenatal growth charts. Br J Obstet Gynaecol 1999, 106(4):309-317.                                                                                                     | Study design not relevant |
| 14. Ghate M, Pratinidhi A, Gupte A: Risk prediction charts for low birth weight. Indian Pediatr 1996, 33(1):15-18.                                                                                                                                                    | Population not relevant   |

- |                                                                                                                                                                                                                                                            |                                   |
|------------------------------------------------------------------------------------------------------------------------------------------------------------------------------------------------------------------------------------------------------------|-----------------------------------|
| 15. Harding K, Evans S, Newnham J: Screening for the small fetus: A study of the relative efficacies of ultrasound biometry and symphysiofundal height. <i>Aust N Z J Obstet Gynaecol</i> 1995, 35(2):160-164.                                             | Relevant data was not extractable |
| 16. Indraccolo U, Chiocci L, Rosenberg P, Nappi L, Greco P: Usefulness of symphysis-fundal height in predicting fetal weight in healthy term pregnant women. <i>Clin Exp Obstet Gynecol</i> 2008, 35(3):205-207.                                           | Population not relevant           |
| 17. Isager-Sally L, Nielsen PV, Andersen J: Symphysis/fundus measurements. Investigation of the method. [Danish]. <i>Ugeskr Laeger</i> 1985, 147(7):609-611.                                                                                               | Study design not relevant         |
| 18. Kennedy I: The implications of introducing the symphyseal-fundal height-measurement. A prospective randomized controlled trial [2]. <i>Br J Obstet Gynaecol</i> 1992, 99(7):625-626.                                                                   | Population not relevant           |
| 19. Linasmita V: Antenatal screening of small-for-gestational age infants by symphysial-fundal height measurement. <i>Journal of the Medical Association of Thailand = Chotmaihet thangkaet</i> 1985, 68(11):587-591.                                      | Population not relevant           |
| 20. Linasmita V: Serial symphysis--fundal height measurements in detection of abnormal fetal growth. <i>Journal of the Medical Association of Thailand = Chotmaihet thangkaet</i> 1986, 69(11):585-589.                                                    | Population not relevant           |
| 21. Linasmita V, Sugkraroek P: Normal uterine growth curve by measurement of symphysial-fundal height in pregnant women seen at Ramathibodi Hospital. <i>Journal of the Medical Association of Thailand = Chotmaihet thangkaet</i> 1984, 67 Suppl 2:22-26. | Population not relevant           |
| 22. Lindhard A: The measurement of symphyseal-fundal height. <i>Nurs Times</i> 1990, 86(42):58-59.                                                                                                                                                         | Not an original study             |
| 23. Lindhard A, Nielsen PV, Mouritsen LA, Zachariassen A, Sorensen HU, Roseno H: The implications of introducing the symphyseal-fundal height-measurement. A prospective randomized controlled trial. <i>Br J Obstet Gynaecol</i> 1990, 97(8):675-680.     | Study design not relevant         |
| 24. Mathai M, Jairaj P, Muthurathnam S: Screening for light-for-gestational age infants: A comparison of three simple measurements. <i>Br J Obstet Gynaecol</i> 1987, 94(3):217-221.                                                                       | Population not relevant           |
| 25. Mattioli KP, Sanderson M, Chauhan SP: Inadequate identification of small-for-gestational-age fetuses at an urban teaching hospital. <i>International Journal of Gynecology and Obstetrics</i> 2010, 109(2):140-143.                                    | Population not relevant           |
| 26. Mongelli M, Gardosi J: Estimation of fetal weight by symphysis-fundus height measurement. <i>International Journal of Gynecology and Obstetrics</i> 2004, 85(1):50-51.                                                                                 | Study design not relevant         |
| 27. Norton R: The prediction of intrauterine growth retardation in remote area Aboriginal women using serial fundal-symphysial height measurements. <i>Aust N Z J Obstet Gynaecol</i> 1989, 29(3 II):306-307.                                              | Population not relevant           |
| 28. Ohwada M, Igarashi M: [Evaluation of measurement of maternal symphysis-fundus length as fetal growth screening method]. <i>Nippon Sanka Fujinka Gakkai Zasshi</i> 1983, 35(5):637-644.                                                                 | Population not relevant           |
| 29. Okonofua FE, Ayangade SO, Chan RCW, O'Brien PMS: A prospective comparison of clinical and ultrasonic methods of predicting normal and abnormal fetal growth. <i>International Journal of Gynecology and Obstetrics</i> 1986, 24(6):447-451.            | Population not relevant           |

- |                                                                                                                                                                                                                                                                                         |                                   |
|-----------------------------------------------------------------------------------------------------------------------------------------------------------------------------------------------------------------------------------------------------------------------------------------|-----------------------------------|
| 30. Pattinson RC, Theron GB: Inter-observer variation in symphysis-fundus measurements: A plea for individualised antenatal care. S Afr Med J 1989, 76(11):621-622.                                                                                                                     | Population not relevant           |
| 31. Pillay P, Janaki S, Manjila C: A comparative study of gravidogram and ultrasound in detection of IUGR. Journal of Obstetrics and Gynecology of India 2012, 62(4):409-412.                                                                                                           | Population not relevant           |
| 32. Pommier M, Escobedo F, Lowenberg E: Measurement of height of the uterine fundus for detection of retarded intrauterine growth. [Spanish] Estudio De La Altura Del Fondo Uterino Para La Deteccion Del Crecimiento Intrauterino Retardado. Ginecol Obstet Mex 1979, 46(276):253-259. | Population not relevant           |
| 33. Reynolds JL, Kettner A, Burnett M, Cheang M: Can fundal height predict birth weight or twins? Can Fam Physician 1986, 32:55-60.                                                                                                                                                     | Unclear index test                |
| 34. Roex A, Nikpoor P, Van Eerd E, Hodyl N, Dekker G: Serial plotting on customised fundal height charts results in doubling of the antenatal detection of small for gestational age fetuses in nulliparous women. Aust N Z J Obstet Gynaecol 2012, 52(1):78-82.                        | Study design not relevant         |
| 35. Rondo PHC, Maia Filho NL, Valverde KK: Symphysis-fundal height and size at birth. International Journal of Gynecology and Obstetrics 2003, 81(1):53-54.                                                                                                                             | Population not relevant           |
| 36. Rosendahl H, Kivinen S: Detection of small for gestational age fetuses by the combination of clinical risk factors and ultrasonography. European Journal of Obstetrics Gynecology and Reproductive Biology 1991, 39(1):7-11.                                                        | Index test not relevant           |
| 37. Rosser J: Cochrane made simple. Symphysis-fundal height measurement. Practising Midwife 2000, 3(1):10-10.                                                                                                                                                                           | Not an original study             |
| 38. Secher NJ, Lundbye-Christensen S, Qvist I, Bagger P: An evaluation of clinical estimation of fetal weight and symphysis fundal distance for detection of SGA infants. European Journal of Obstetrics Gynecology and Reproductive Biology 1991, 38(2):91-96.                         | Population not relevant           |
| 39. Theron GB, Theron AM, Odendaal HJ: Symphysis-fundus growth measurement followed by umbilical artery Doppler velocimetry to screen for placental insufficiency. International Journal of Gynecology and Obstetrics 2002, 79(3):263-264.                                              | Population not relevant           |
| 40. Tjon Ten AWE, Kusin JA, De With C: Fundal height measurement as an antenatal screening method. J Trop Pediatr 1985, 31(5):249-252.                                                                                                                                                  | Population not relevant           |
| 41. Westin B: Gravidogram and fetal growth. Comparison with biochemical supervision. Acta Obstet Gynecol Scand 1977, 56(4):273-282.                                                                                                                                                     | Relevant data was not extractable |
| 42. Wise D, Engstrom JL: The predictive validity of fundal height curves in the identification of small- and large-for-gestational-age infants. Journal of obstetric, gynecologic, and neonatal nursing : JOGNN / NAACOG 1985, 14(2):87-92.                                             | Study design not relevant         |
| 43. Wright J, Morse K, Kady S, Francis A: Audit of fundal height measurement plotted on customised growth charts. MIDIRS Midwifery Digest 2006, 16(3):341-345.                                                                                                                          | Index test not relevant           |
-
